# Supplementary material for: Confined deep red light-detecting organic phototransistors with polymer gate-sensing layers consisting of indacenothiophene and dinitrobenzothiadiazole units
Source: Royal Society of Chemistry journal article supplement (doi:10.1039/d4tc02698e), 2024-01-01
Supplement: d4tc02698e1.pdf [file d4tc02698e1.pdf]

## Supporting Information

### **Confined deep red light-detecting organic phototransistors with polymer gate-sensing layers consisting of indaceno thiophene and dinitrobenzothiadiazole units**

Chanbin Park<sup>a,b</sup>, Taehoon Kim<sup>a</sup>, Hwajeong Kim<sup>a,c</sup> and Youngkyoo Kim<sup>a,b\*</sup>

<sup>a</sup> Organic Nanoelectronics Laboratory and KNU Institute for Nanophotonics Applications (KINPA), Department of Chemical Engineering, School of Applied Chemical Engineering, Kyungpook National University, Daegu 41566, Republic of Korea

<sup>b</sup> Department of Energy Convergence & Climate Change and Institute for Global Climate Change and Energy, Kyungpook National University, Daegu 41566, Republic of Korea

<sup>c</sup> Priority Research Center, Research Institute of Environmental Science & Technology, Kyungpook National University, Daegu 41566, Republic of Korea

\*Corresponding Author: Prof. Y. Kim

E-mail) [ykimm@knu.ac.kr](mailto:ykimm@knu.ac.kr) Tel) +82-(0)53-950-5616

**Table S1.** Summary of photoresponsivity ( $R_c$ ) and photosensitivity ( $S_p$ ) for the OPTRs with the GSLs and VLCLs under illumination. Note that the incident light intensity ( $P_{IN}$ ) was 162, 277, and 281  $\mu\text{W}/\text{cm}^2$  at the wavelength ( $\lambda$ ) of 550, 670, and 700 nm, respectively.

| Wavelength<br>(nm) | Thickness<br>(nm) | $S_p$ (%) |         | $R_c$ (mA/W) |         |
|--------------------|-------------------|-----------|---------|--------------|---------|
|                    |                   | w/o VLCL  | w/ VLCL | w/o VLCL     | w/ VLCL |
| 550                | 40                | 96.43     | 0.31    | 2.23         | 0       |
|                    | 120               | 92.17     | 0       | 1.53         | 0       |
| 670                | 40                | 43.25     | 30.64   | 0.58         | 0.41    |
|                    | 120               | 48.16     | 31.46   | 0.47         | 0.34    |
| 700                | 40                | 28.12     | 20.19   | 0.37         | 0.26    |
|                    | 120               | 32.28     | 30.14   | 0.32         | 0.31    |

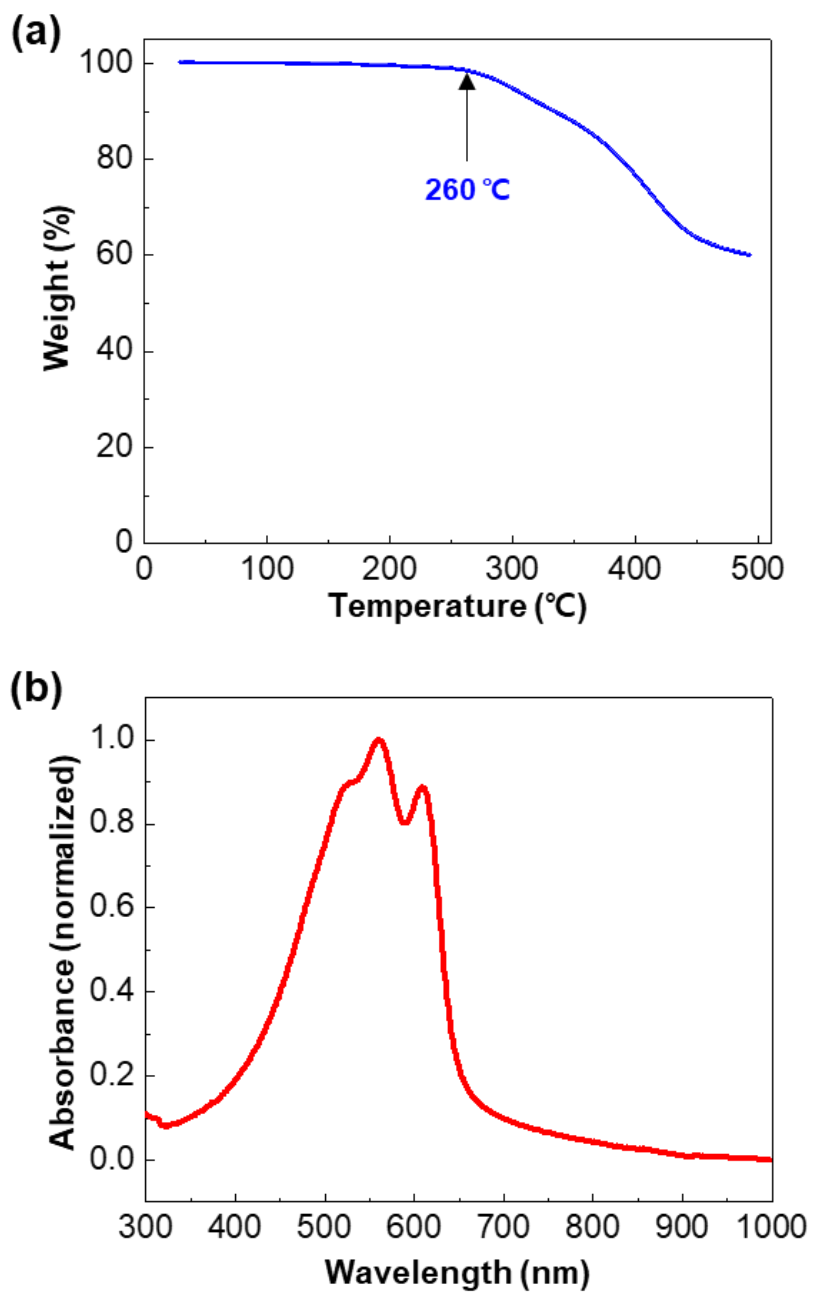

**Figure S1.** (a) TGA thermogram of PIDTT-DNBT solid (ramp rate = 10 °C/min under nitrogen flow). (b) Optical absorption spectrum for the thin P3HT film ( $t = 80$  nm).

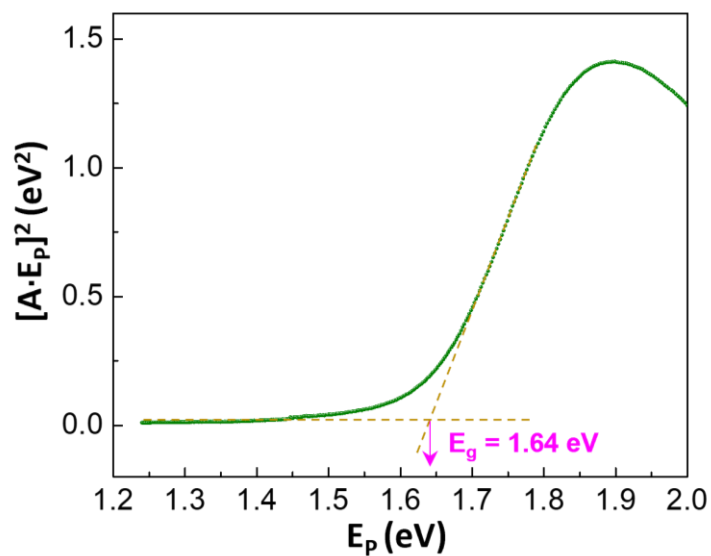

**Figure S2.** Tauc plot of the PIDTT-DNBT film from the optical absorption spectrum in Figure 1(b). ‘A’ and ‘E<sub>p</sub>’ denote absorbance and photon energy, respectively.

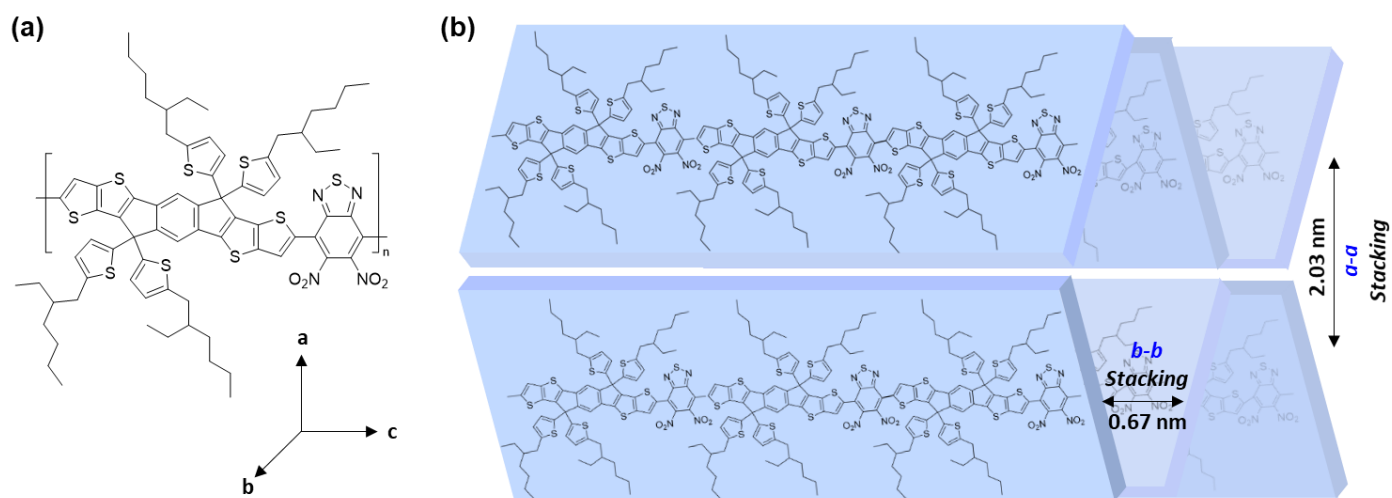

**Figure S3.** (a) Assignment of axis according to the molecular structure of PIDTT-DNBT. (b) Illustration for the possible stacking structure of PIDTT-DNBT chains. The stacking distance (d-spacing) in the a-a and b-b directions was calculated from the GIWAXS profiles.

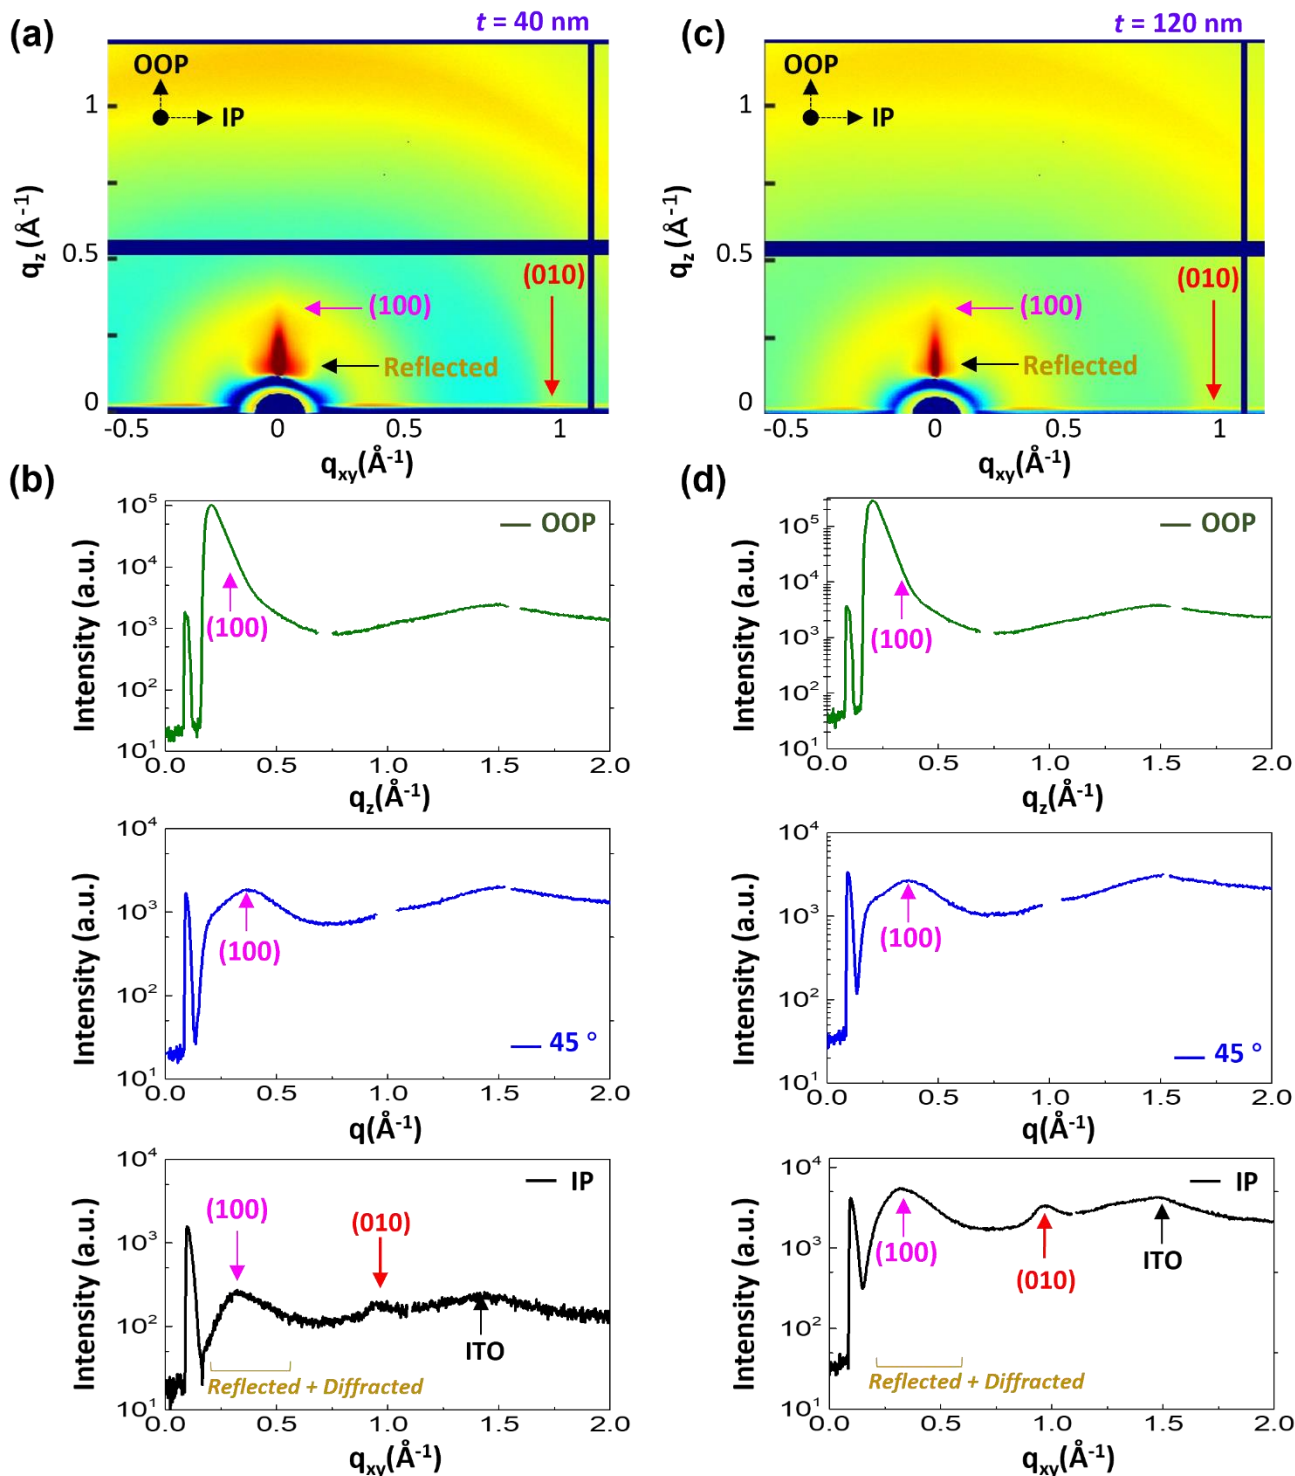

**Figure S4.** GIWAXS data for the PIDTT-DNBT films ( $t = 40$  nm and  $120$  nm): (a,c) 2D images, (b,d) 1D profiles. OOP and IP denote the out-of-plane and in-plane directions in the films, respectively. Note that the 1D profile at  $45^\circ$  was obtained by extracting scattering data at the azimuthal angle of  $45^\circ$  in the 2D image (see Y. Kim et al., *Soft Matt.*, 3, 117 (2007)).

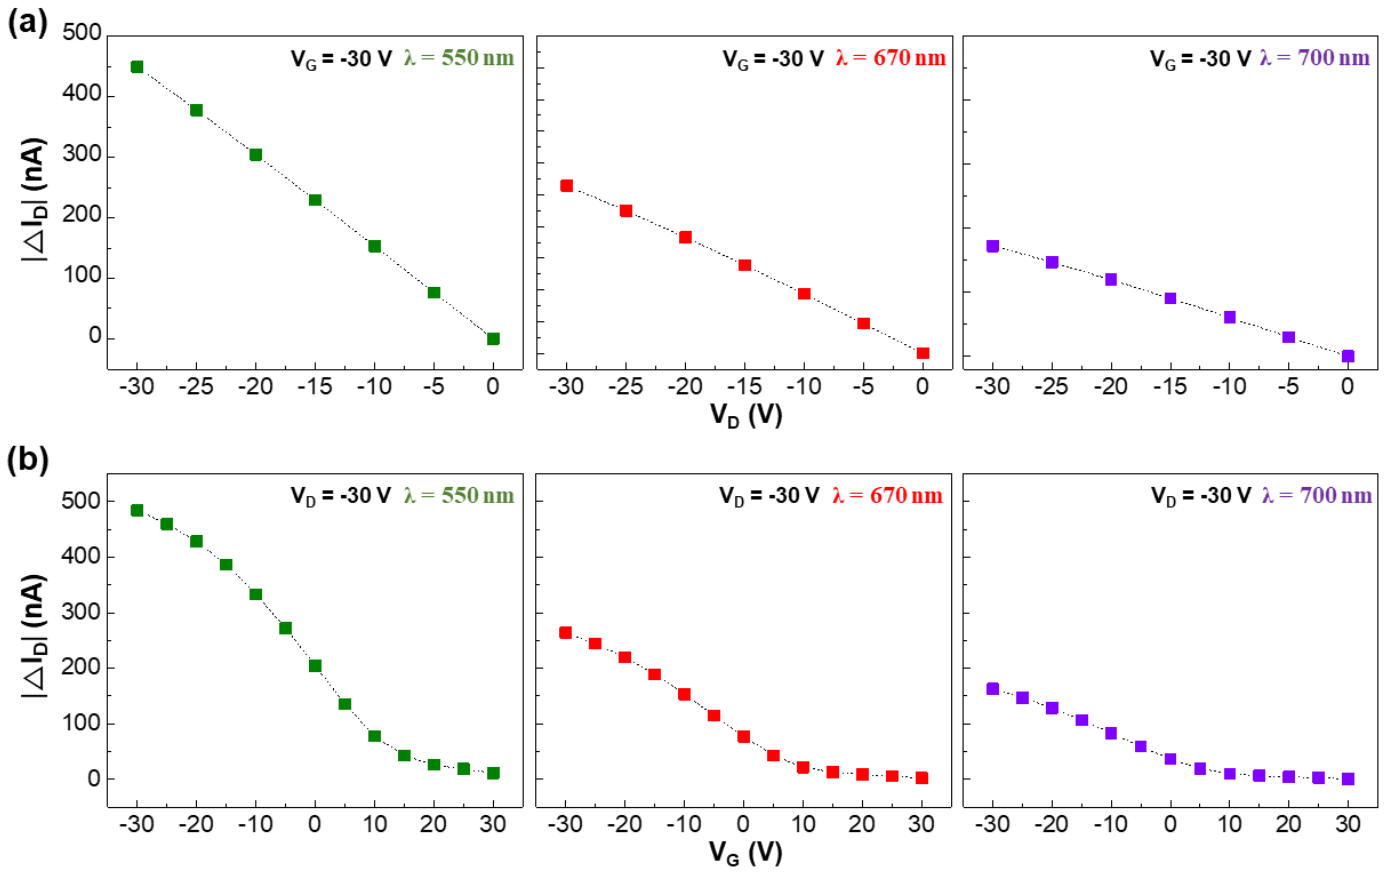

**Figure S5.** Net drain current ( $\Delta I_D$ ) for the OPTRs with the PIDTT-DNBT GSLs ( $t = 40$  nm) (no VLCLs) under illumination with three different monochromatic lights: (a) from output curves, (b) from transfer curves. Note that the incident light intensity ( $P_{IN}$ ) was 162, 277, and 281  $\mu\text{W}/\text{cm}^2$  at the wavelength ( $\lambda$ ) of 550, 670, and 700 nm, respectively.

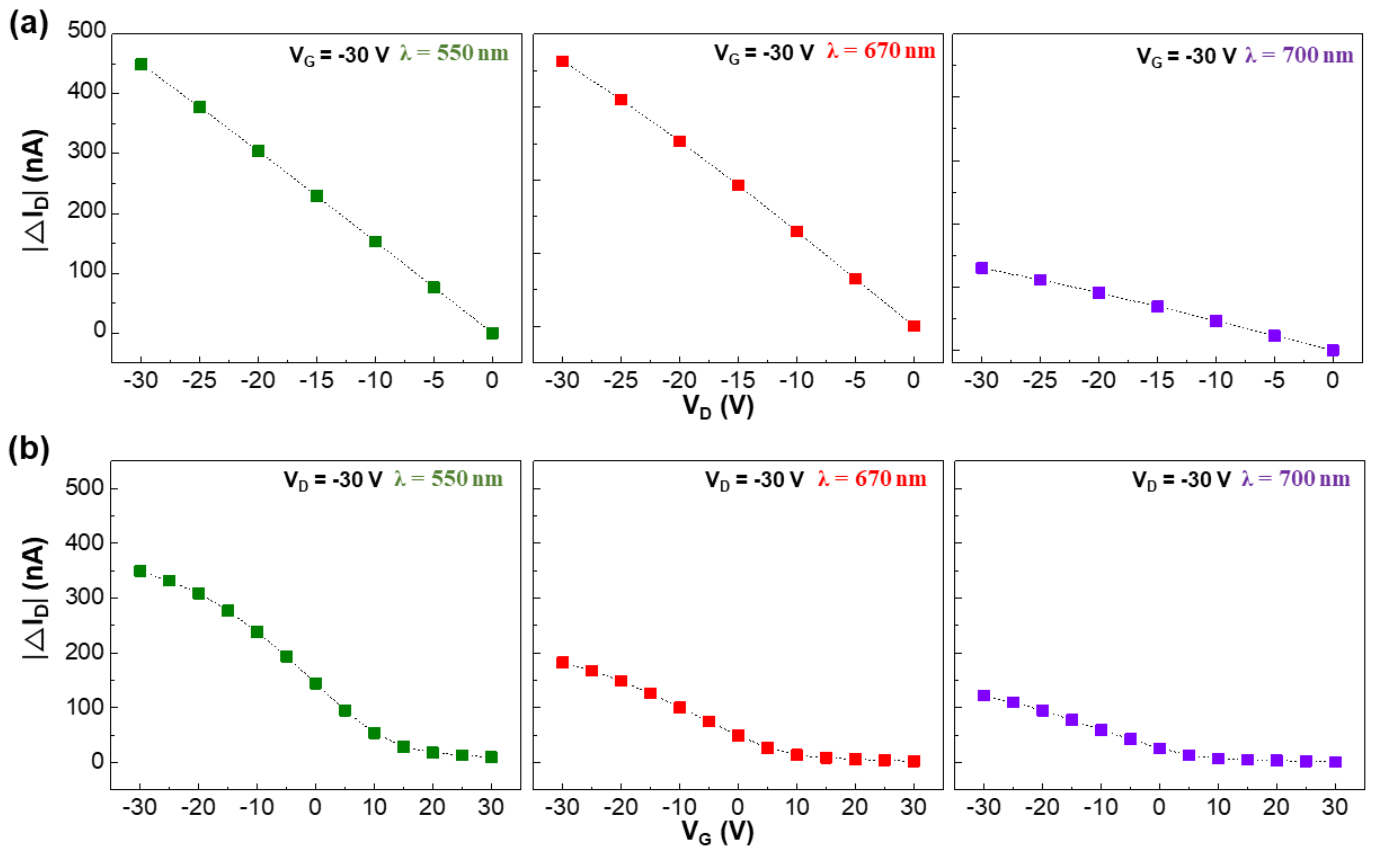

**Figure S6.** Net drain current ( $\Delta I_D$ ) for the OPTRs with the PIDTT-DNBT GSLs ( $t = 120$  nm) (no VLCLs) under illumination with three different monochromatic lights: (a) from output curves, (b) from transfer curves. Note that the incident light intensity ( $P_{IN}$ ) was 162, 277, and 281  $\mu\text{W}/\text{cm}^2$  at the wavelength ( $\lambda$ ) of 550, 670, and 700 nm, respectively.

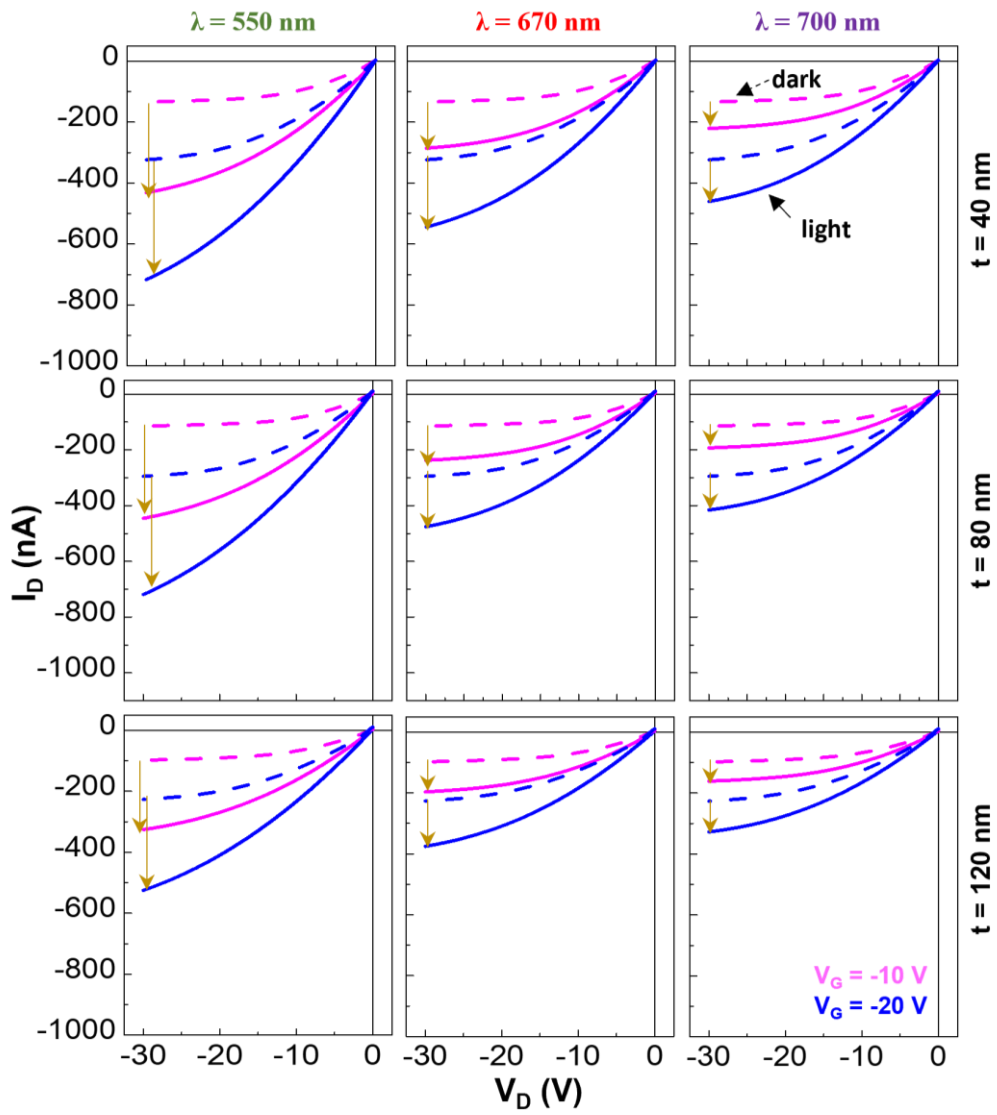

**Figure S7.** Change of drain current ( $V_G = -10 \text{ V}$  and  $-20 \text{ V}$ ) in the output curves for the OPTRs with the PIDTT-DNBT GSLs ( $t = 40, 80, 120 \text{ nm}$ ) (no VLCLs) under illumination with three different monochromatic lights. Note that the incident light intensity ( $P_{\text{IN}}$ ) was 162, 277, and  $281 \mu\text{W}/\text{cm}^2$  at the wavelength ( $\lambda$ ) of 550, 670, and 700 nm, respectively.



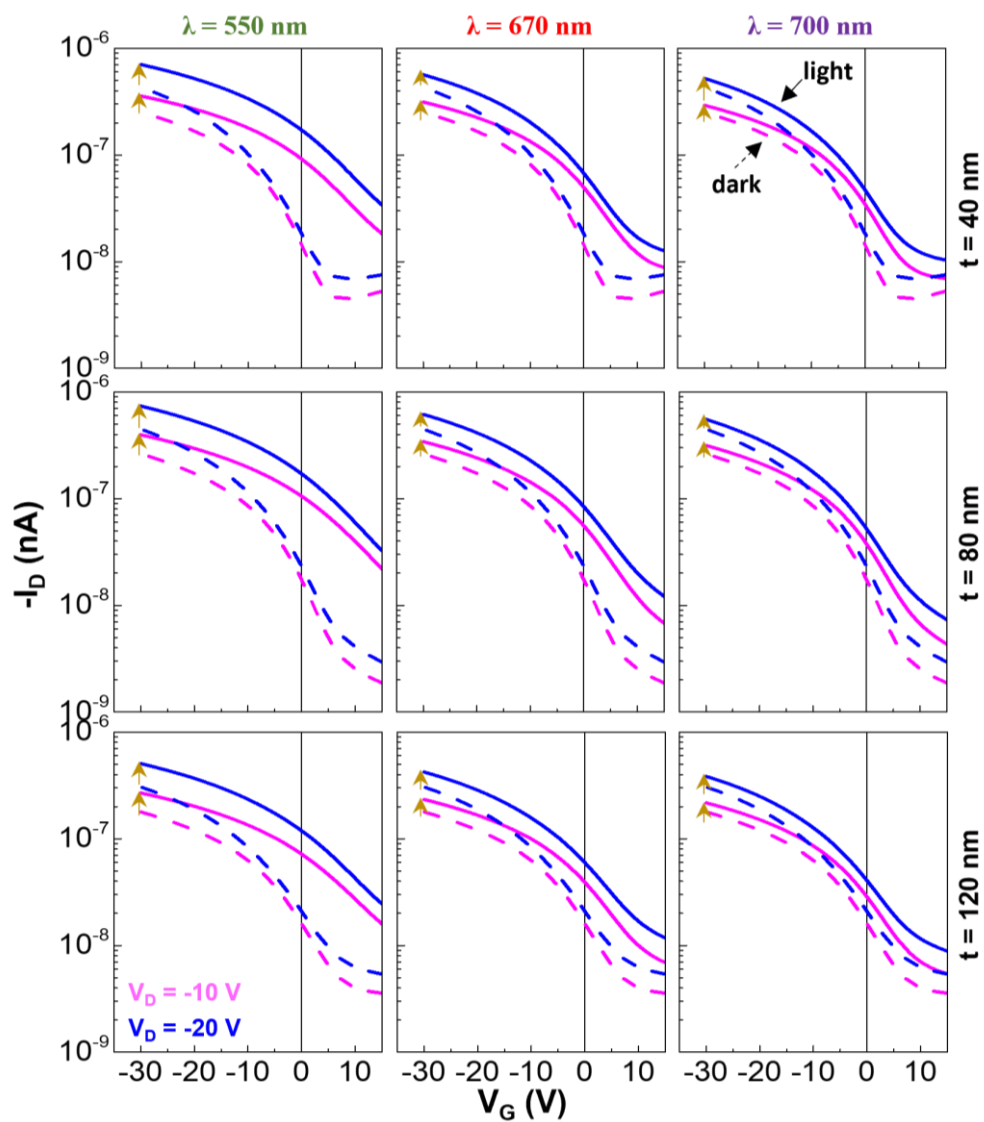

**Figure S8.** Change of drain current ( $V_D = -10$  V and  $-20$  V) in the transfer curves for the OPTRs with the PIDTT-DNBT GSLs ( $t = 40, 80, 120$  nm) (no VLCLs) under illumination with three different monochromatic lights. Note that the incident light intensity ( $P_{IN}$ ) was 162, 277, and 281  $\mu\text{W}/\text{cm}^2$  at the wavelength ( $\lambda$ ) of 550, 670, and 700 nm, respectively.

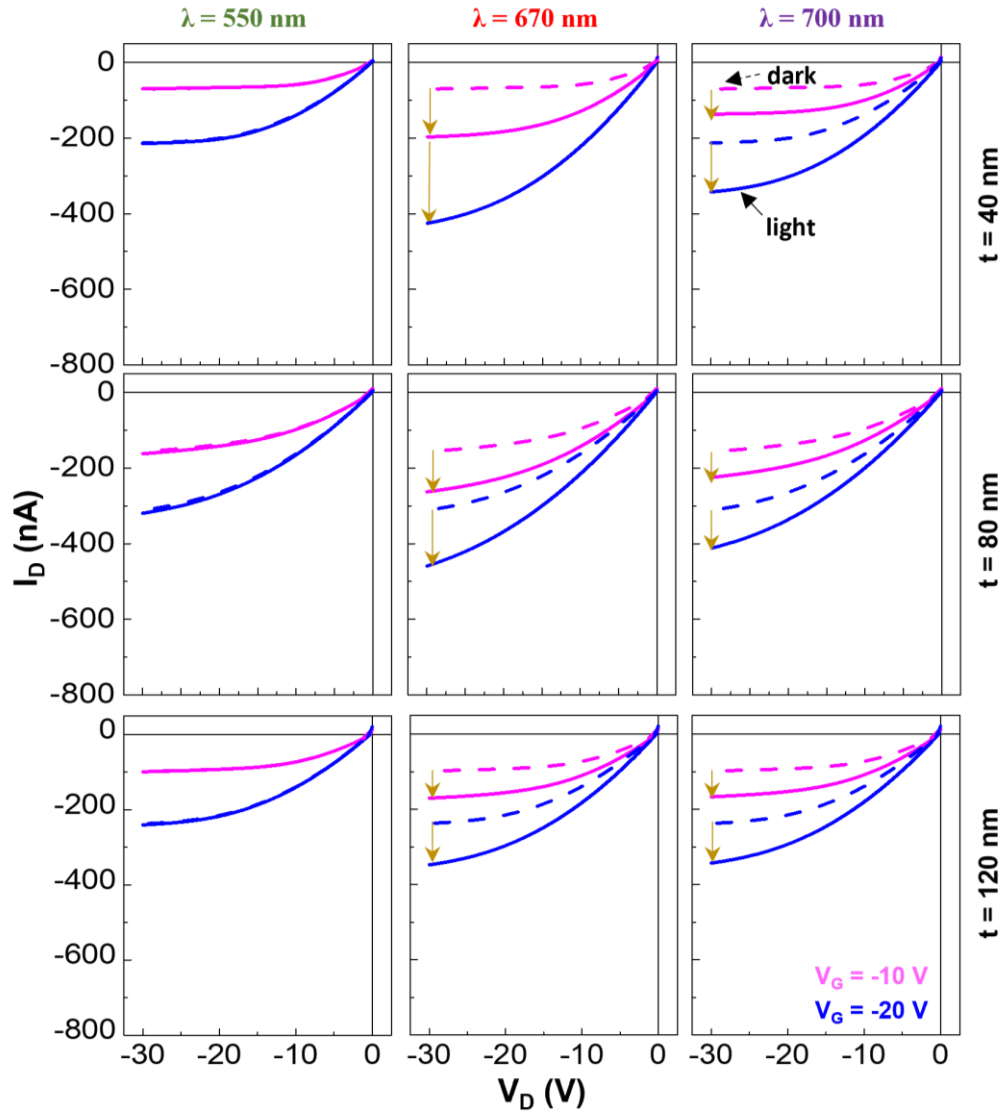

**Figure S9.** Change of drain current ( $V_G = -10$  V and  $-20$  V) in the output curves for the OPTRs with both the PIDTT-DNBT GSLs ( $t = 40, 80, 120$  nm) and the VLCLs under illumination with three different monochromatic lights. Note that the incident light intensity ( $P_{IN}$ ) was 162, 277, and 281  $\mu\text{W}/\text{cm}^2$  at the wavelength ( $\lambda$ ) of 550, 670, and 700 nm, respectively.

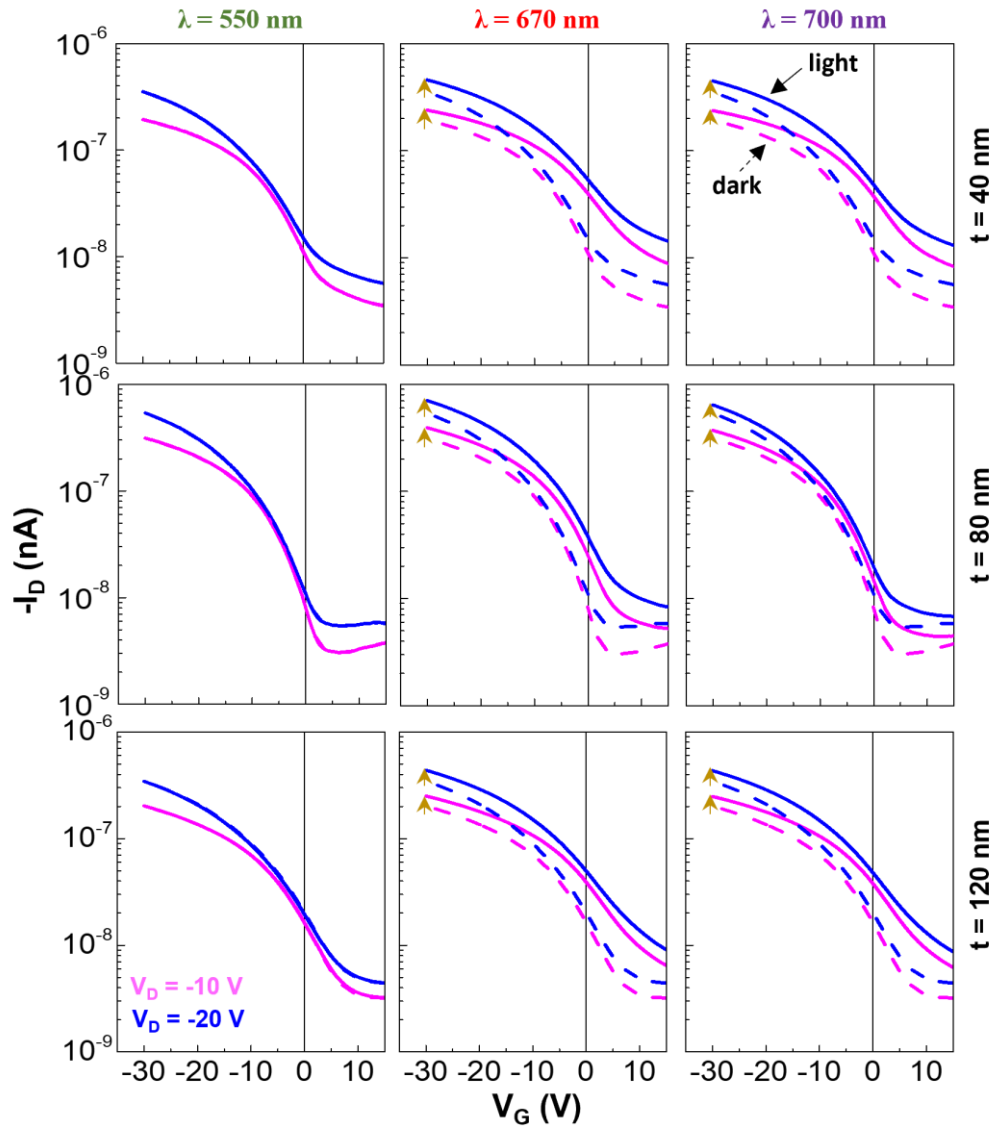

**Figure S10.** Change of drain current ( $V_D = -10$  V and  $-20$  V) in the transfer curves for the OPTRs with both the PIDTT-DNBT GSLs ( $t = 40, 80, 120$  nm) and the VLCLs under illumination with three different monochromatic lights. Note that the incident light intensity ( $P_{IN}$ ) was 162, 277, and 281  $\mu\text{W}/\text{cm}^2$  at the wavelength ( $\lambda$ ) of 550, 670, and 700 nm, respectively.

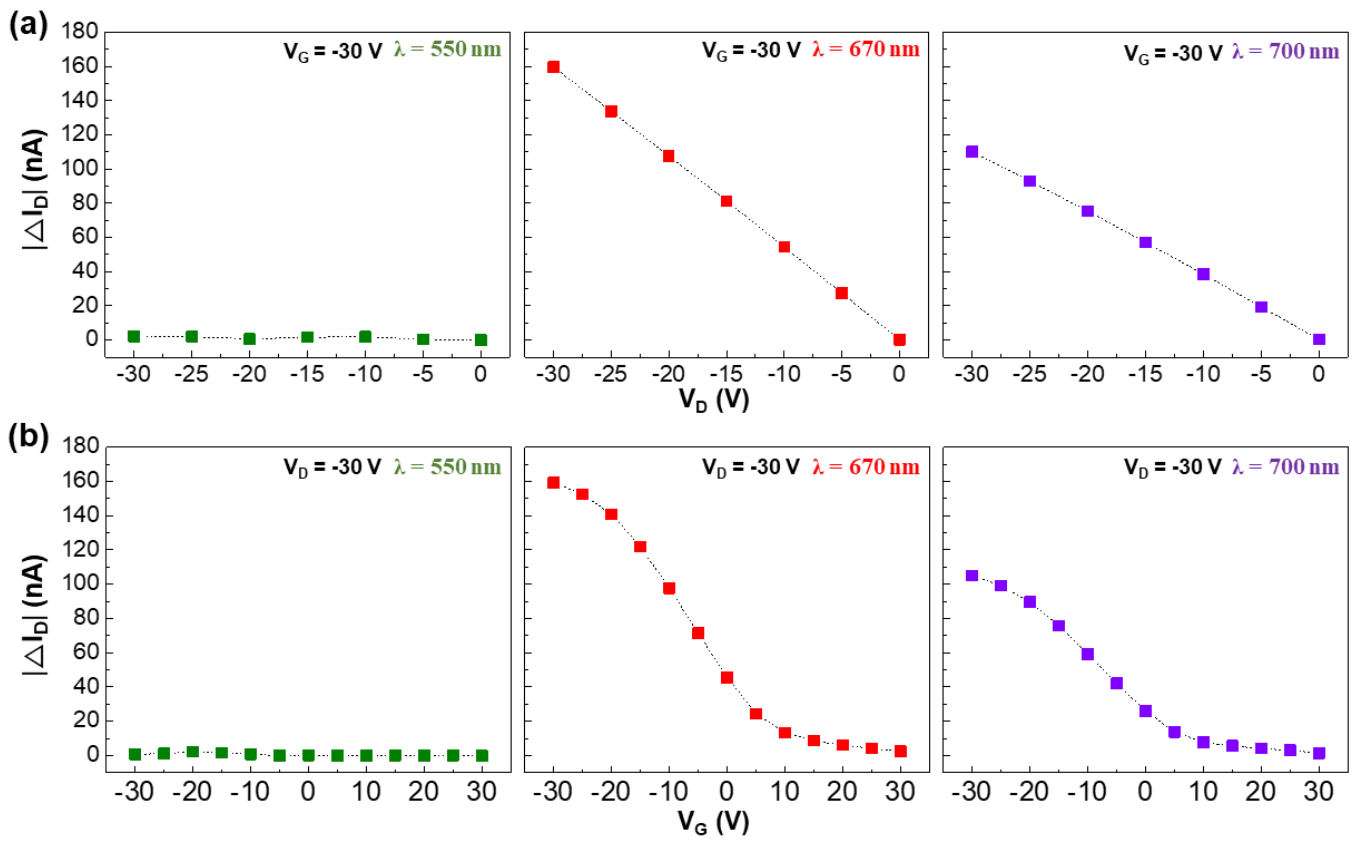

**Figure S11.** Change of net drain current ( $\Delta I_D$ ) for the OPTRs with both the PIDTT-DNBT GSLs ( $t = 40$  nm) and the VLCLs under illumination with three different monochromatic lights: (a) from output curves, (b) from transfer curves. Note that the incident light intensity ( $P_{IN}$ ) was 162, 277, and 281  $\mu\text{W}/\text{cm}^2$  at the wavelength ( $\lambda$ ) of 550, 670, and 700 nm, respectively.

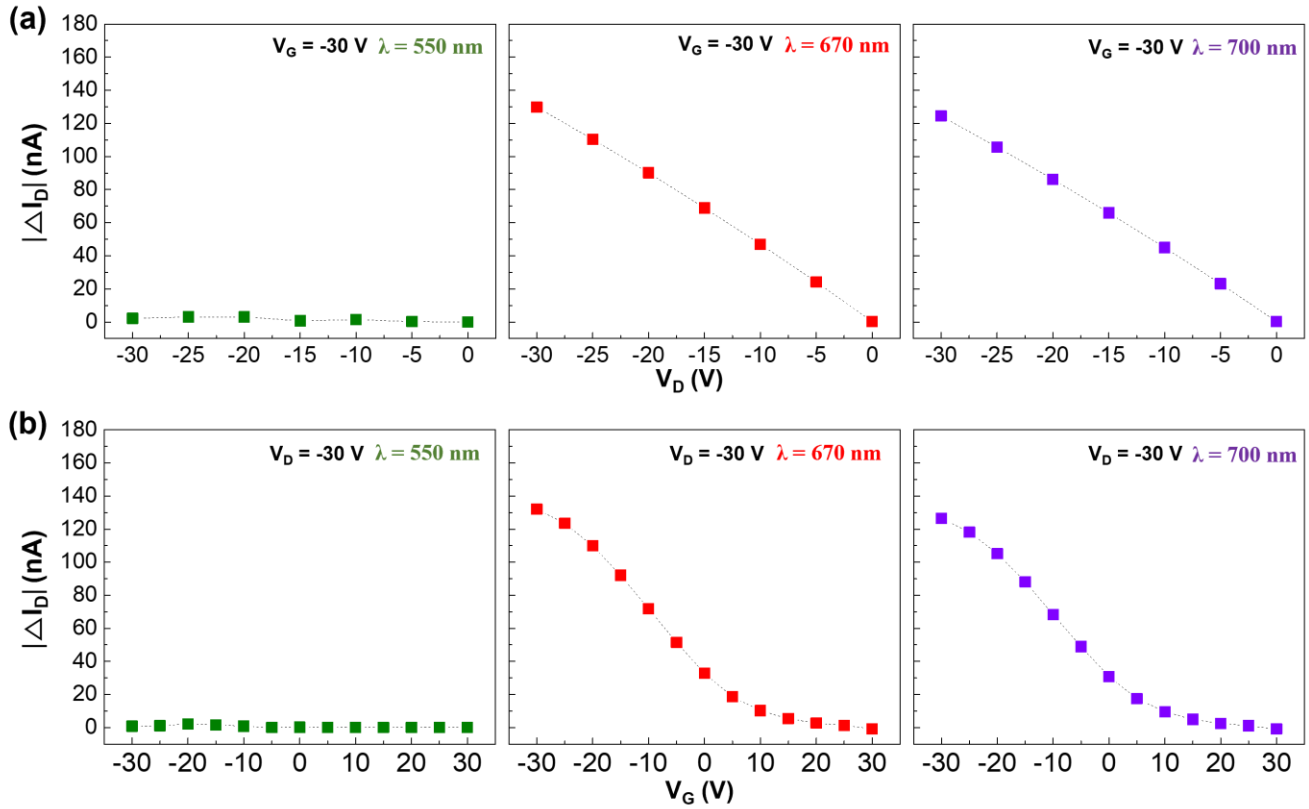

**Figure S12.** Change of net drain current ( $\Delta I_D$ ) for the OPTRs with both the PIDTT-DNBT GSLs ( $t = 120$  nm) and the VLCLs under illumination with three different monochromatic lights: (a) from output curves, (b) from transfer curves. Note that the incident light intensity ( $P_{IN}$ ) was 162, 277, and  $281 \mu\text{W}/\text{cm}^2$  at the wavelength ( $\lambda$ ) of 550, 670, and 700 nm, respectively.
